# Supplementary material for: Novel bis- and tris-cyclometalated iridium(iii) complexes bearing a benzoyl group on each fluorinated 2-phenylpyridinate ligand aimed at development of blue phosphorescent materials for OLED
Source: Royal Society of Chemistry journal article supplement (doi:10.1039/c6ra09385j), 2016-01-01
Supplement: c6ra09385j1.pdf [file c6ra09385j1.pdf]

## Supplementary information

### Novel bis- and tris-cyclometalated iridium(III) complexes bearing a benzoyl group on each fluorinated 2-phenylpyridinate ligand aimed at development of blue phosphorescent materials for OLED

Naoki Okamura,<sup>a</sup> Taiyo Nakamura,<sup>a</sup> Shigeyuki Yagi,<sup>a,\*</sup> Takeshi Maeda,<sup>a</sup> Hiroyuki Nakazumi,<sup>a</sup> Hideki Fujiwara,<sup>b</sup> and Shiro Koseki<sup>b</sup>

<sup>a</sup>*Department of Applied Chemistry, Graduate School of Engineering, Osaka Prefecture University, 1-1 Gakuen-cho, Naka-ku, Sakai, Osaka 599-8531, Japan.*

<sup>b</sup>*Department of Chemistry, Graduate School of Science, Osaka Prefecture University, 1-1 Gakuen-cho, Naka-ku, Sakai, Osaka 599-8531, Japan.*

E-mail to the corresponding author: yagi@chem.osakafu-u.ac.jp.

- **Fig. S1** ORTEP drawings of **Ir-3a** and **Ir-3c**.
- **Table S1** Crystal data and structure refinement for **Ir-3a** and **Ir-3c**.
- **Table S2** Selected bond distance and angles for **Ir-3a**.
- **Table S3** Selected bond distance and angles for **Ir-3c**.
- **Fig. S2** Phosphorescence spectra of **Ir-1a**, **Ir-1c**, **Ir-2a**, **Ir-2c**, and **Ir-3a–c** in 2MeTHF glass matrix at 77 K.
- **Fig. S3** Cyclic voltammograms of **Ir-1a**, **Ir-1c**, **Ir-2a**, **Ir-2c**, and **Ir-3a–c**.
- **Fig. S4** Optimized geometry structures and electron configurations of HOMO and LUMO for **Ir-2c** and **Ir-3c**.
- **Fig. S5** Voltage-luminance and voltage-current density curves of Device-1 employing bis-cyclometarated complexes.
- **Fig. S6** Voltage-luminance and voltage-current density curves of Device-1 employing tris-cyclometarated complexes.
- **Fig. S7** EL spectra of Device-2a–c.
- **Fig. S8** <sup>1</sup>H NMR spectra of **HC<sup>N</sup>-2** and **HC<sup>N</sup>-3**.
- **Fig. S9** <sup>1</sup>H NMR spectra of **Ir-1c**, **Ir-2a–c**, and **Ir-3a–c**.

(a) **Ir-3a**

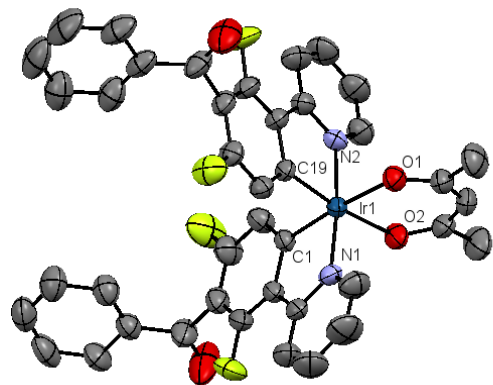

(b) **Ir-3c**

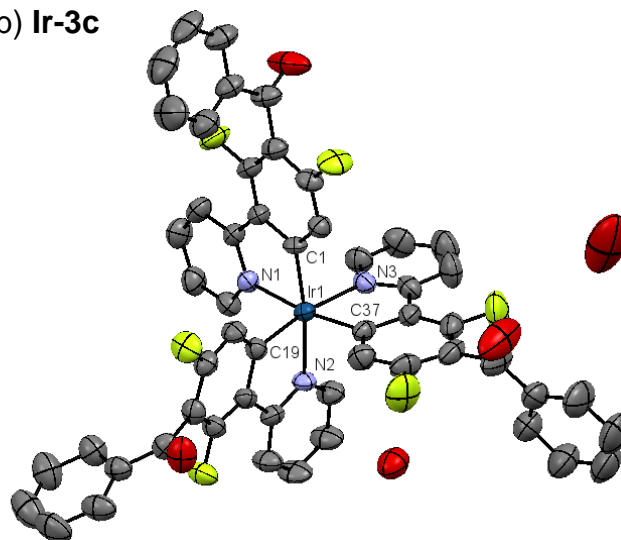

**Fig. S1** ORTEP drawings of (a) **Ir-3a** and (b) **Ir-3c**·2H<sub>2</sub>O with ellipsoids at the 50% probability level. Atom labels are added to the selected atoms around the metal center.

**Table S1** Crystal data and structure refinement for **Ir-3a** and **Ir-3c**.

| Parameter                                           | <b>Ir-3a</b>                                                                   | <b>Ir-3c</b>                                                                                      |
|-----------------------------------------------------|--------------------------------------------------------------------------------|---------------------------------------------------------------------------------------------------|
| Formula                                             | C <sub>41</sub> H <sub>27</sub> F <sub>4</sub> IrN <sub>2</sub> O <sub>4</sub> | C <sub>54</sub> H <sub>30</sub> F <sub>6</sub> IrN <sub>3</sub> O <sub>3</sub> ·2H <sub>2</sub> O |
| Formula weight                                      | 879.89                                                                         | 1111.09                                                                                           |
| Crystal system                                      | Monoclinic                                                                     | Monoclinic                                                                                        |
| Space group                                         | <i>C2/c</i> (#15)                                                              | <i>P2<sub>1</sub>/a</i> (#14)                                                                     |
| Lattice Parameters <i>a</i> /Å                      | 41.393(9)                                                                      | 19.190 (3)                                                                                        |
| <i>b</i> /Å                                         | 8.1687(14) Å                                                                   | 10.3544 (16)                                                                                      |
| <i>c</i> /Å                                         | 23.774(5) Å                                                                    | 23.935 (4)                                                                                        |
| $\beta$ /°                                          | 120.926(2)                                                                     | 101.5280 (19)                                                                                     |
| Volume / Å <sup>3</sup>                             | 6896(3)                                                                        | 4660.1 (13)                                                                                       |
| <i>Z</i>                                            | 8                                                                              | 4                                                                                                 |
| Density $\rho_{\text{calc}}$ /g cm <sup>-3</sup>    | 1.695                                                                          | 1.584                                                                                             |
| $\mu$ /cm <sup>-1</sup>                             | 39.508                                                                         | 29.496                                                                                            |
| <i>F</i> (000)                                      | 3456.00                                                                        | 2200.00                                                                                           |
| <i>T</i> /K                                         | 293                                                                            | 293                                                                                               |
| No. of reflections measured                         | 28759                                                                          | 36255                                                                                             |
| No. of reflections used ( <i>R</i> <sub>int</sub> ) | 9259 (0.0265)                                                                  | 12611 (0.040)                                                                                     |
| <i>R</i> <sub>1</sub> , <i>wR</i> <sub>2</sub>      | 0.0390 (0.0459)                                                                | 0.0509 (0.0567)                                                                                   |
| Goodness of fit on <i>F</i> <sup>2</sup>            | 1.067                                                                          | 1.088                                                                                             |
| $\rho_{\text{fin}}$ (max/min) /e Å <sup>3</sup>     | 1.92 /-1.85                                                                    | 2.94 /-1.98                                                                                       |

**Table S2** Selected bond distance and angles for **Ir-3a**.

|             |           | <b>Ir-3a</b> |
|-------------|-----------|--------------|
| Distance /Å | Ir-O1     | 2.131(4)     |
|             | Ir-O2     | 2.133(3)     |
|             | Ir-C1     | 1.991(6)     |
|             | Ir-N1     | 2.043(5)     |
|             | Ir-C19    | 1.995(4)     |
|             | Ir-N2     | 2.036(5)     |
| Angle /°    | O1–Ir–O2  | 88.39(14)    |
|             | N1–Ir–C1  | 80.90(19)    |
|             | N2–Ir–C19 | 81.28(17)    |

**Table S3** Selected bond distance and angles for **Ir-3c**.

|             |           | <b>Ir-3c</b> |
|-------------|-----------|--------------|
| Distance /Å | Ir-C1     | 2.017 (5)    |
|             | Ir-N1     | 2.129 (4)    |
|             | Ir-C19    | 2.016 (5)    |
|             | Ir-N2     | 2.119 (4)    |
|             | Ir-C37    | 2.031 (5)    |
|             | Ir-N3     | 2.129 (4)    |
| Angle /°    | N1–Ir–C1  | 79.56 (18)   |
|             | N2–Ir–C19 | 79.4 (2)     |
|             | N3–Ir–C37 | 78.2 (2)     |

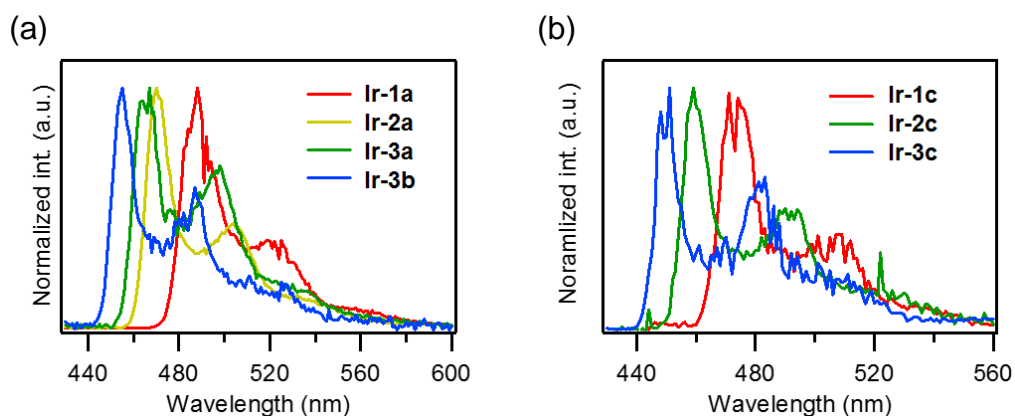

**Fig. S2** Phosphorescence spectra of (a) bis-cyclometalated and (b) tris-cyclometalated complexes in 2-MeTHF glass matrix at 77 K.

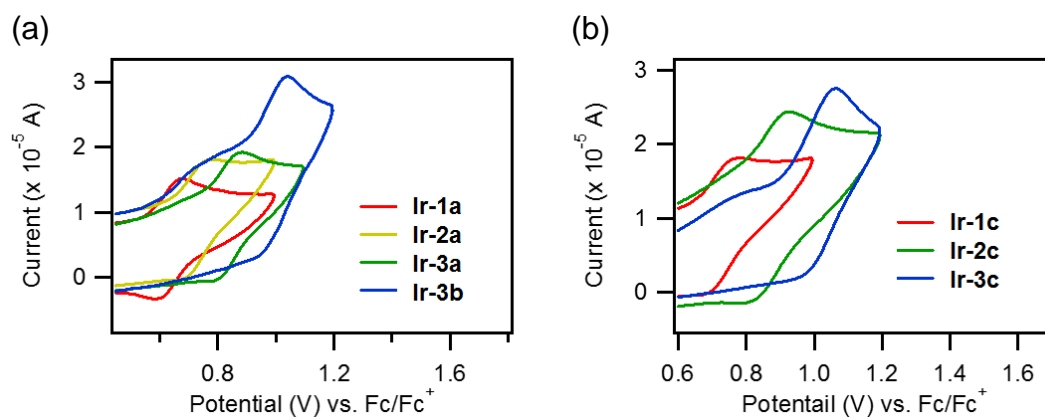

**Fig. S3** Cyclic voltammograms of (a) bis-cyclometalated and (b) tris-cyclometalated complexes in anhydrous acetonitrile at a scan rate of 100 mV s<sup>-1</sup> at rt, where 0.1 M tetrabutylammonium perchlorate was used as a supporting electrolyte.

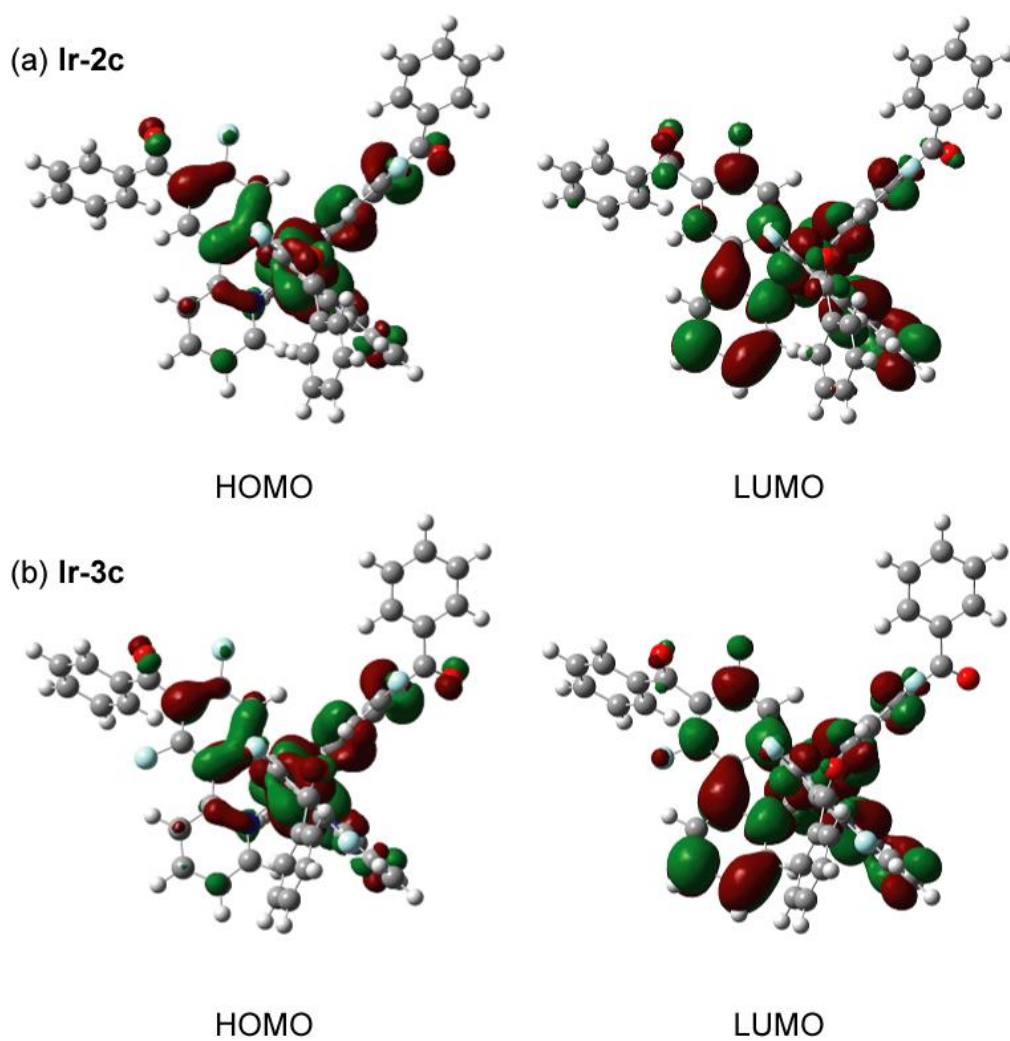

**Fig. S4** Optimized geometry structures and electron configurations of HOMO and LUMO for (a) **Ir-2c** and (b) **Ir-3c**.

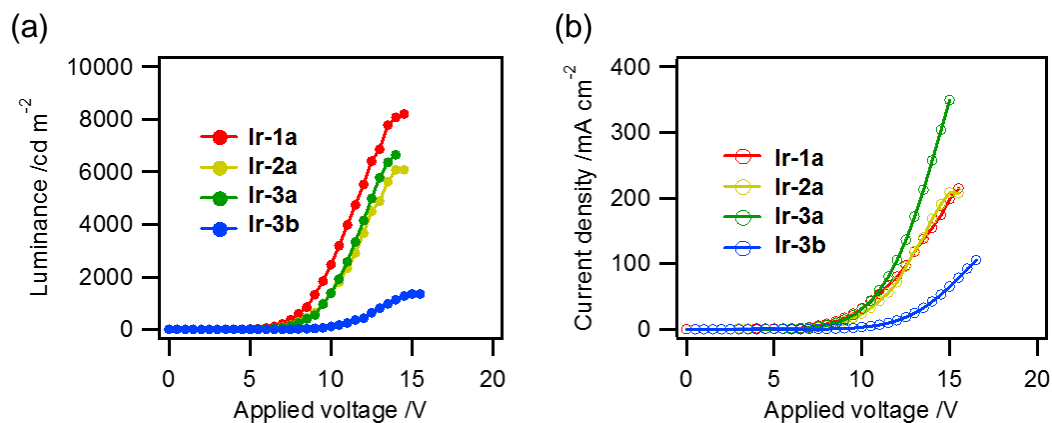

**Fig. S5** (a) Voltage-luminance and (b) voltage-current density curves of the Device-1 employing bis-cyclometarated complexes.

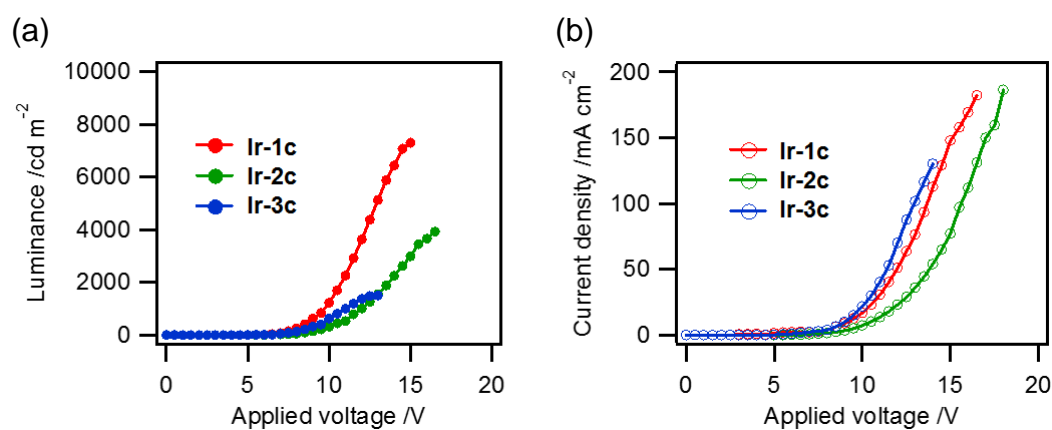

**Fig. S6** (a) Voltage-luminance and (b) voltage-current density curves of the Device-1 employing tris-cyclometarated complexes.

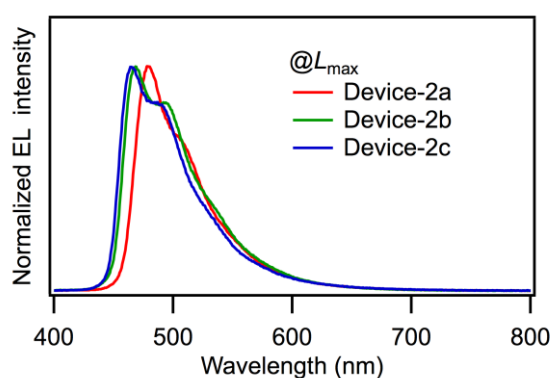

**Fig. S7** EL spectra of **Device-2a–c**.

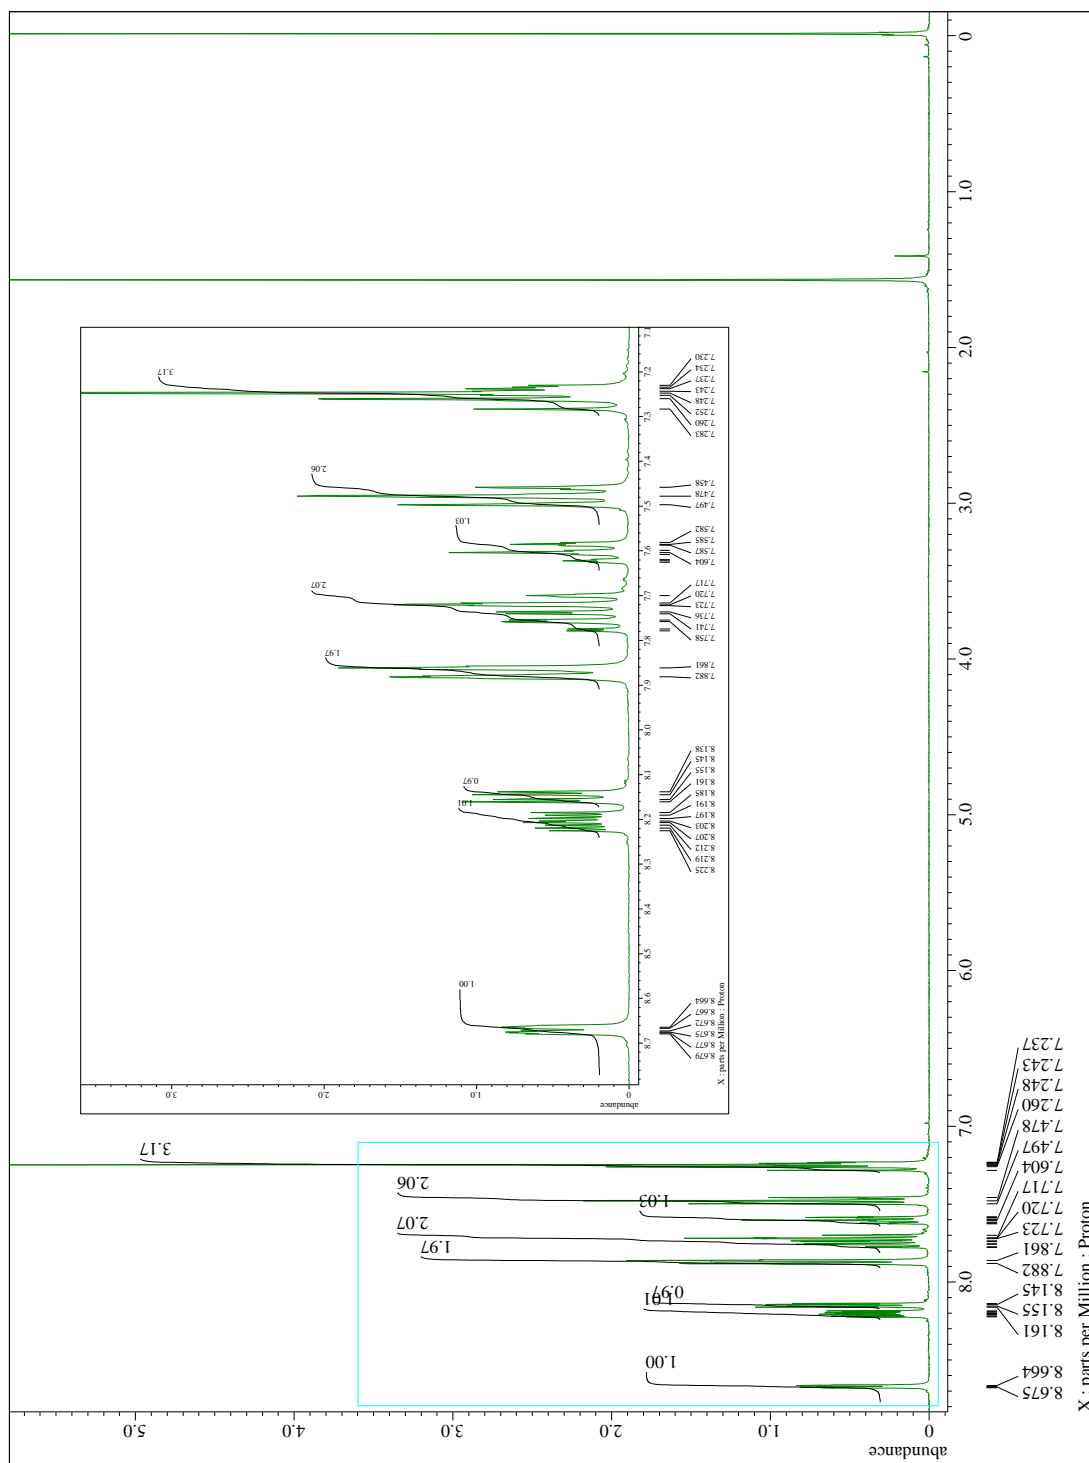

**Fig. S8-1**  $^1\text{H}$  NMR spectrum of  $\text{HC}^{\text{N}}\text{-2}$  in  $\text{CDCl}_3$ .



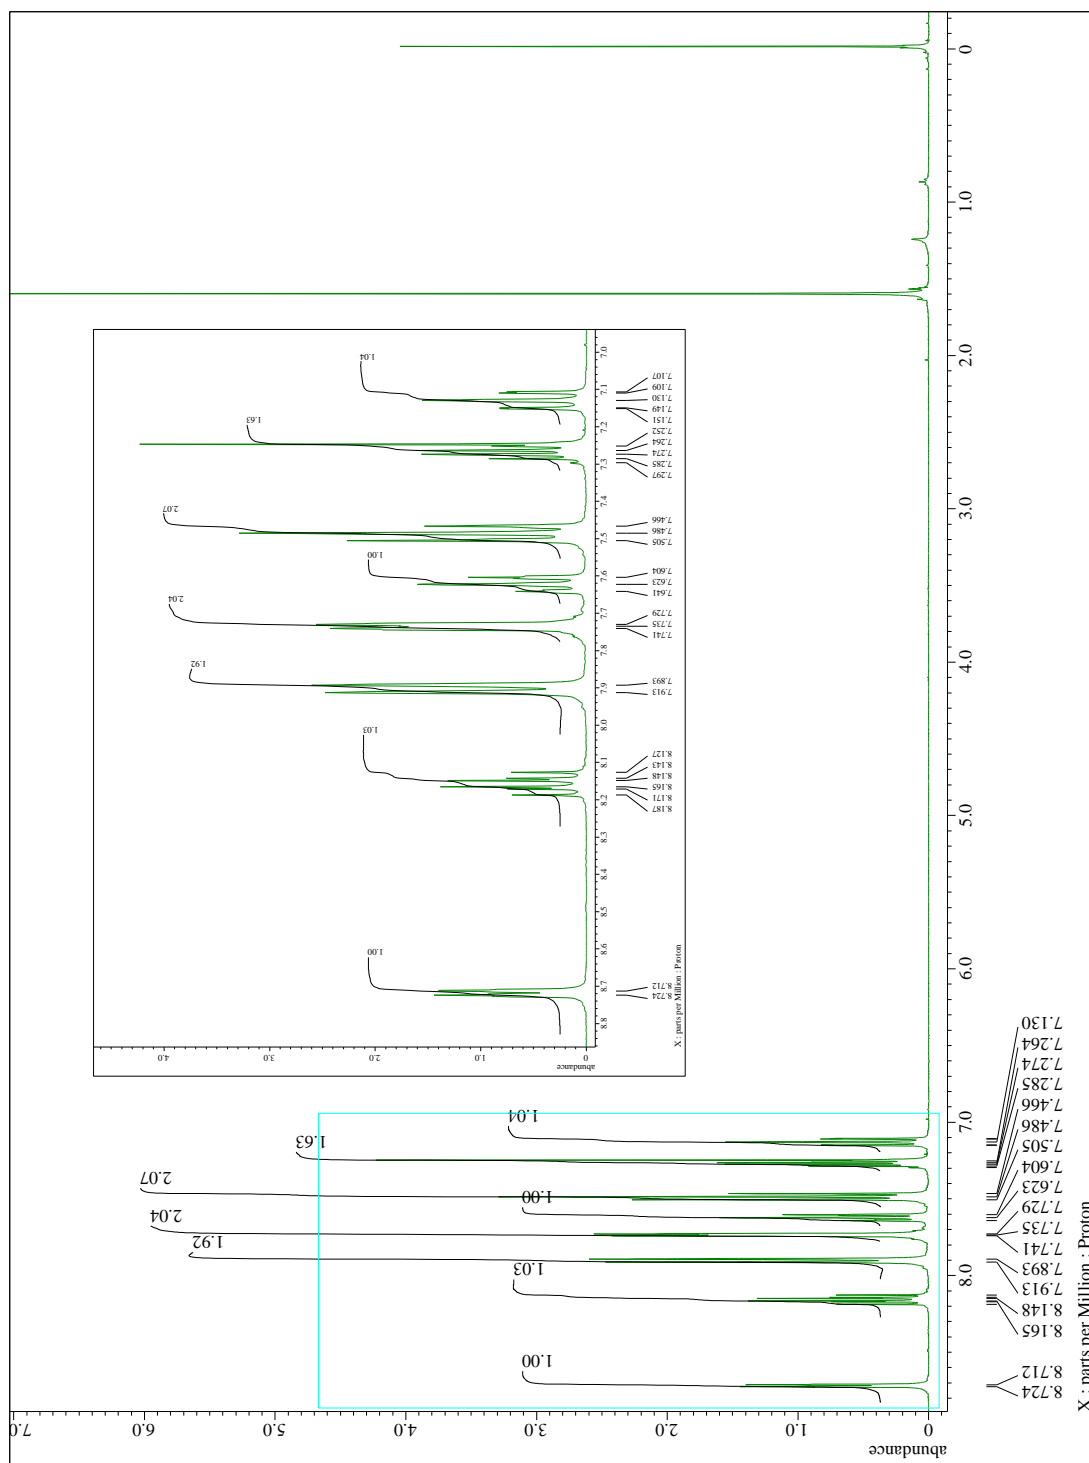

**Fig. S8-2**  $^1\text{H}$  NMR spectrum of  $\text{HC}^{\text{N}}\text{-3}$  in  $\text{CDCl}_3$ .

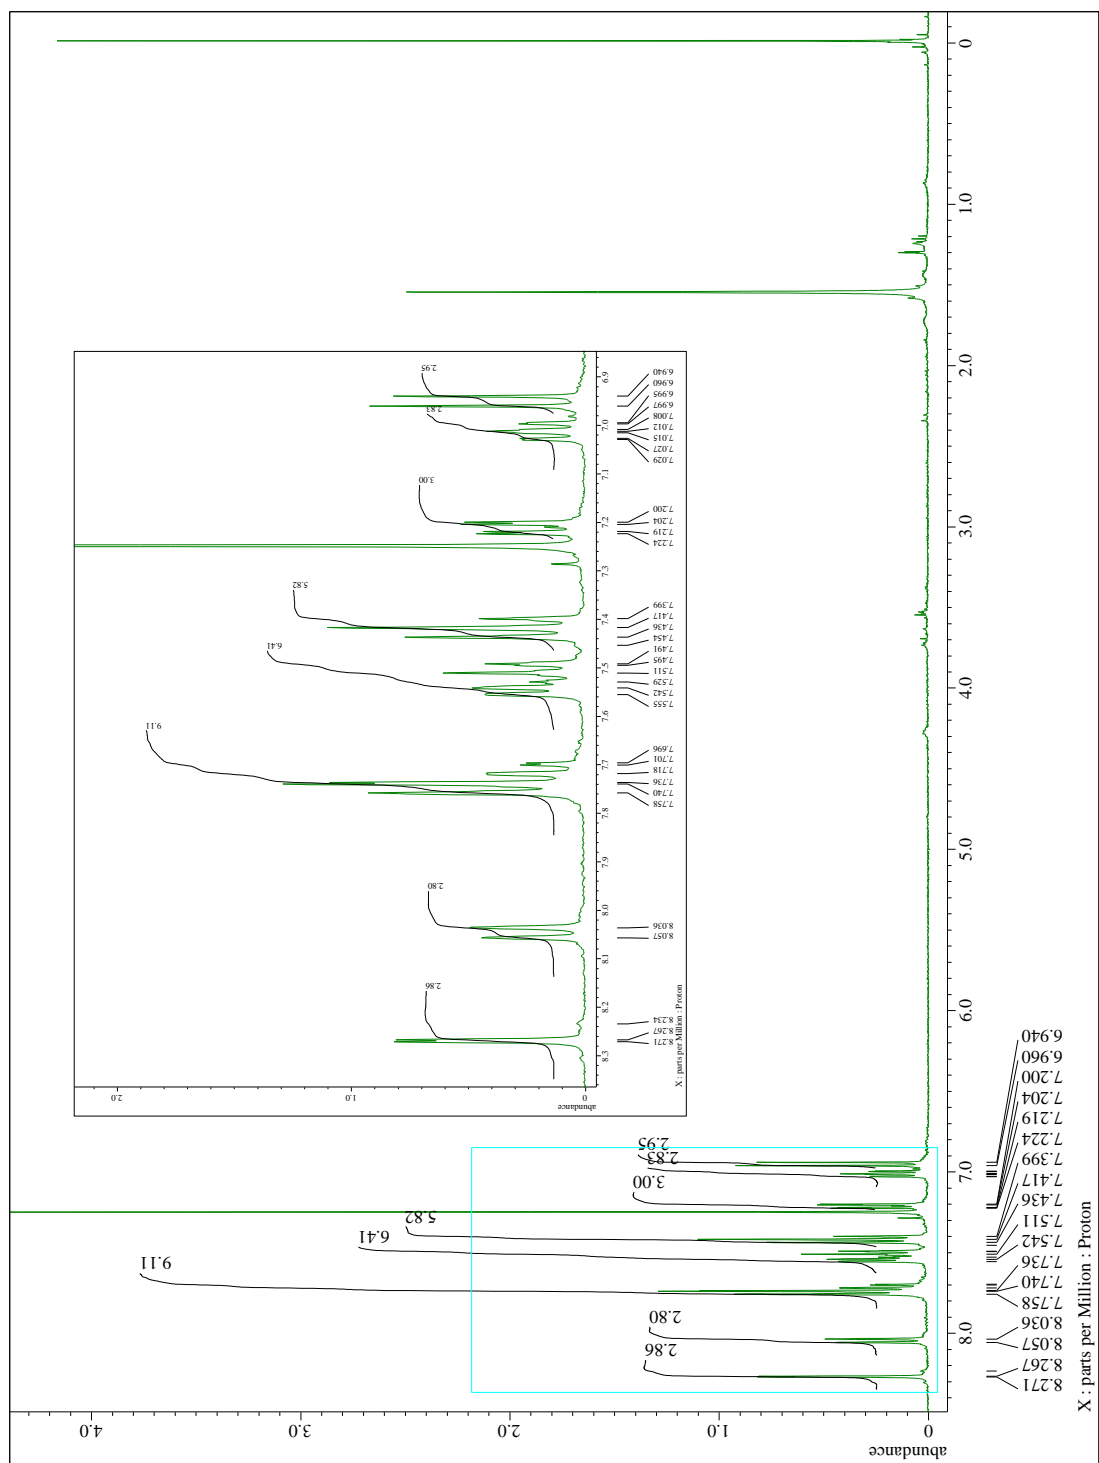

**Fig. S9-1**  $^1\text{H}$  NMR spectrum of **Ir-1c** in  $\text{CDCl}_3$ .

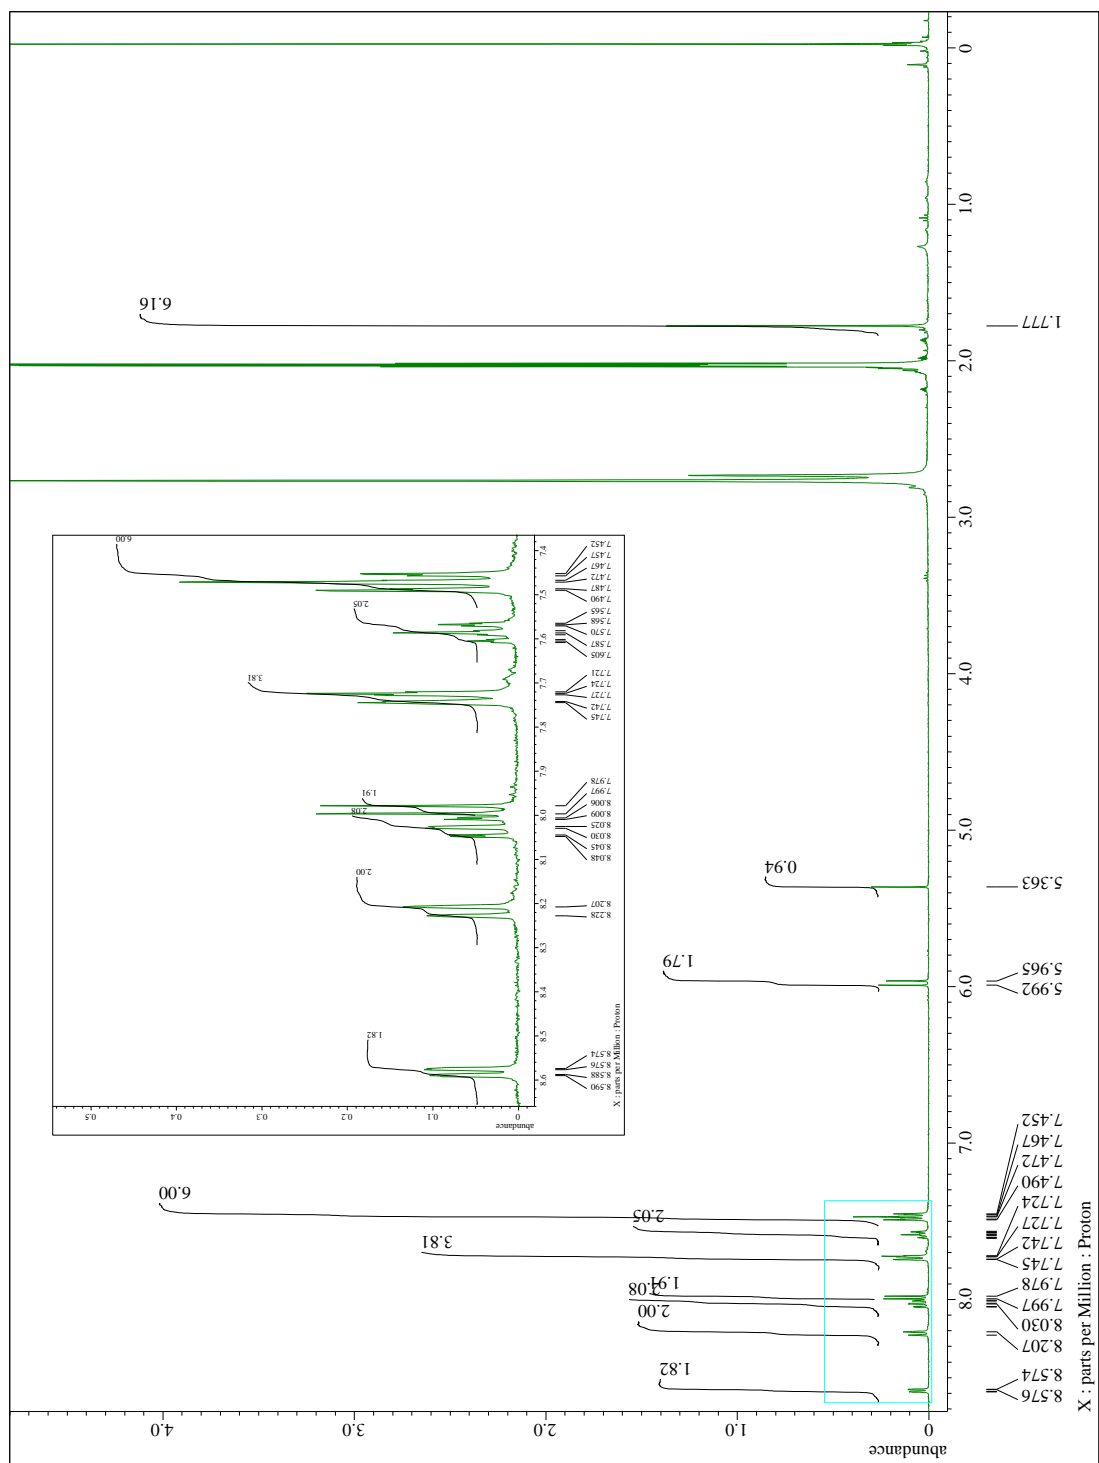

**Fig. S9-2**  $^1\text{H}$  NMR spectrum of **Ir-2a** in  $\text{acetone-d}_6$ .

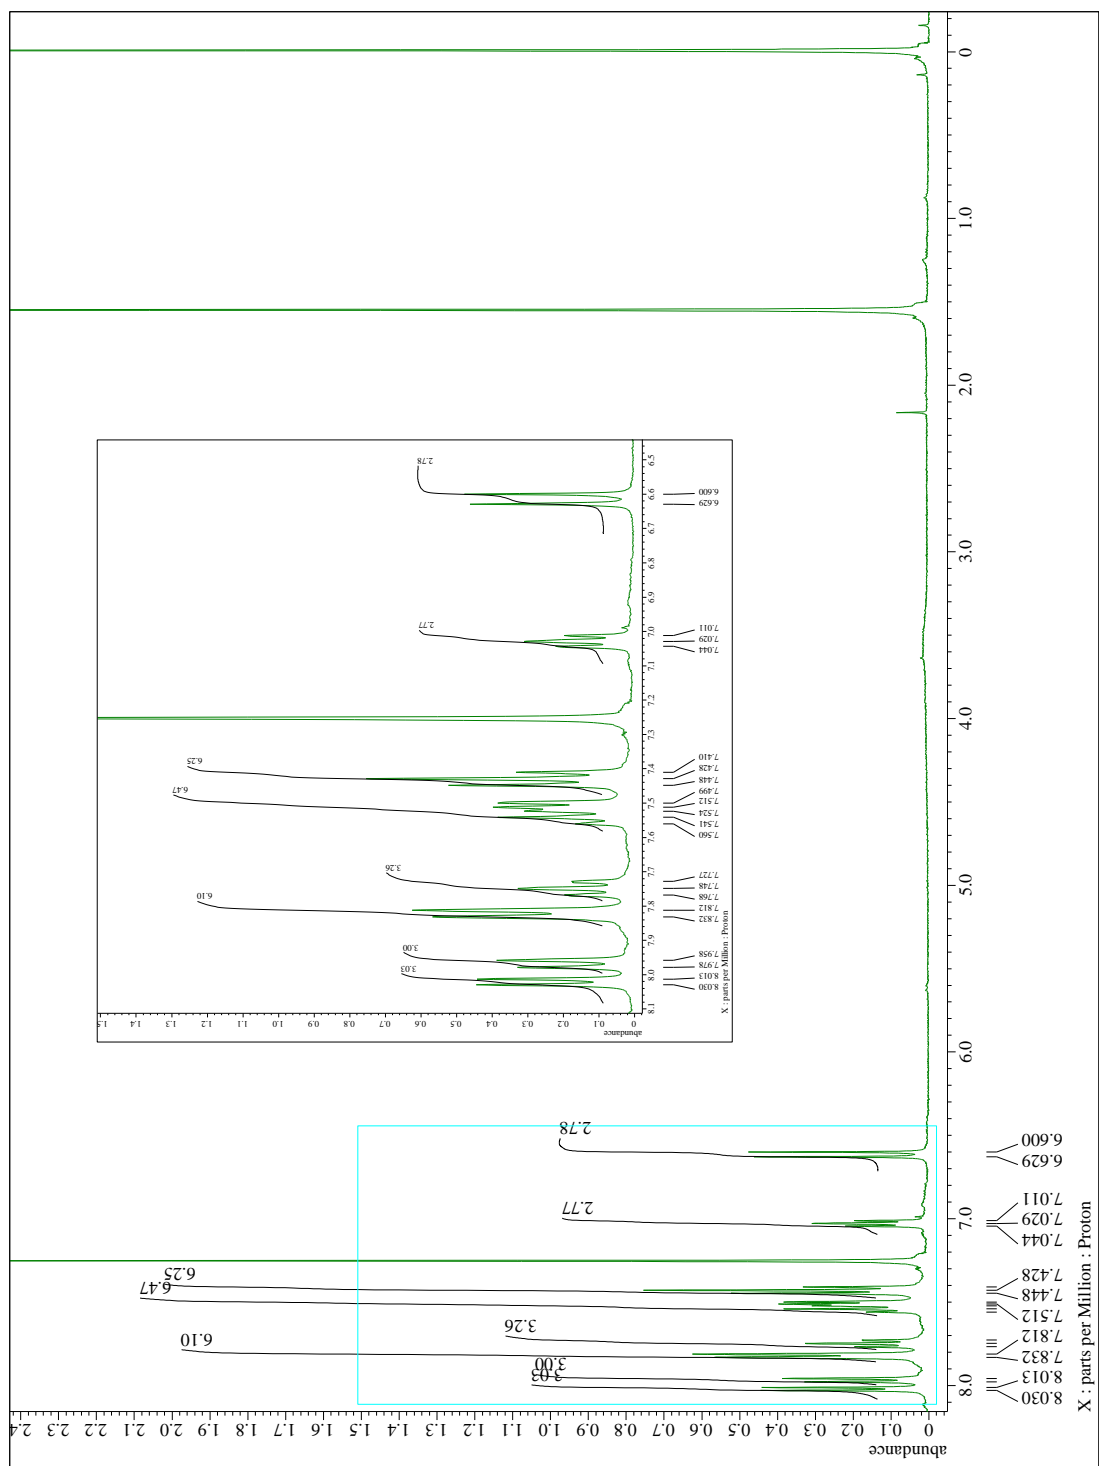

**Fig. S9-3**  $^1\text{H}$  NMR spectrum of **Ir-2c** in  $\text{CDCl}_3$ .

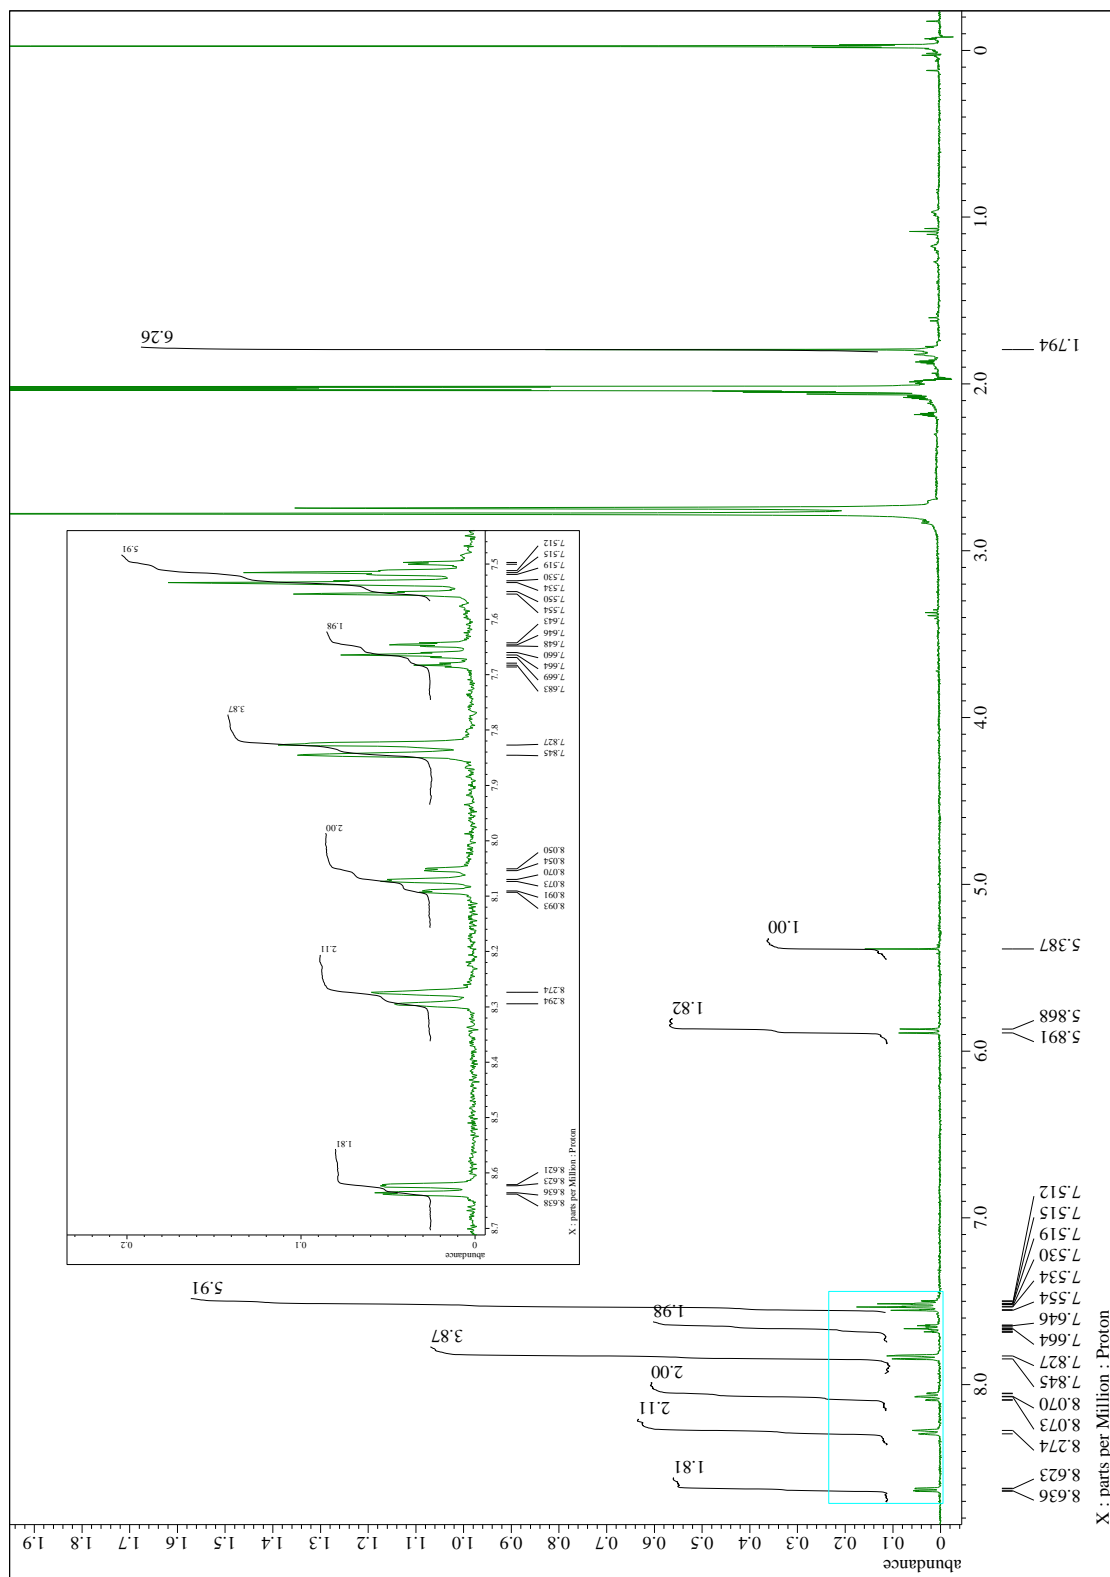

**Fig. S9-4**  $^1\text{H}$  NMR spectrum of **Ir-3a** in  $\text{acetone-}d_6$ .

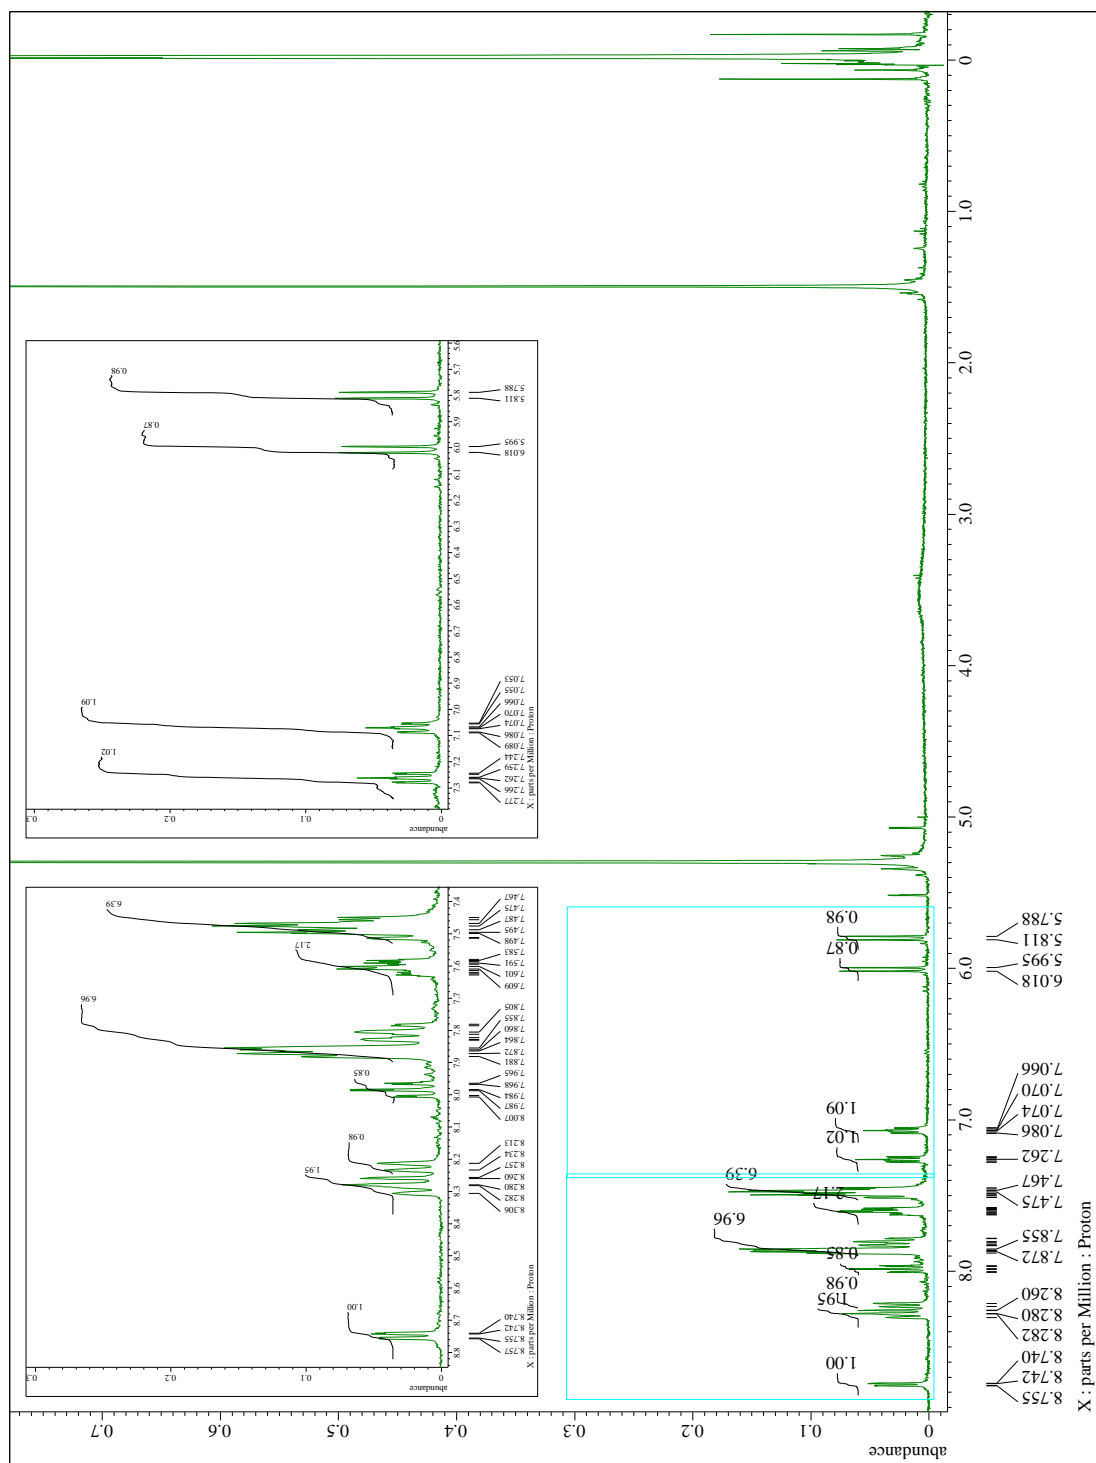

**Fig. S9-5** <sup>1</sup>H NMR spectrum of Ir-3b in CD<sub>2</sub>Cl<sub>2</sub>.

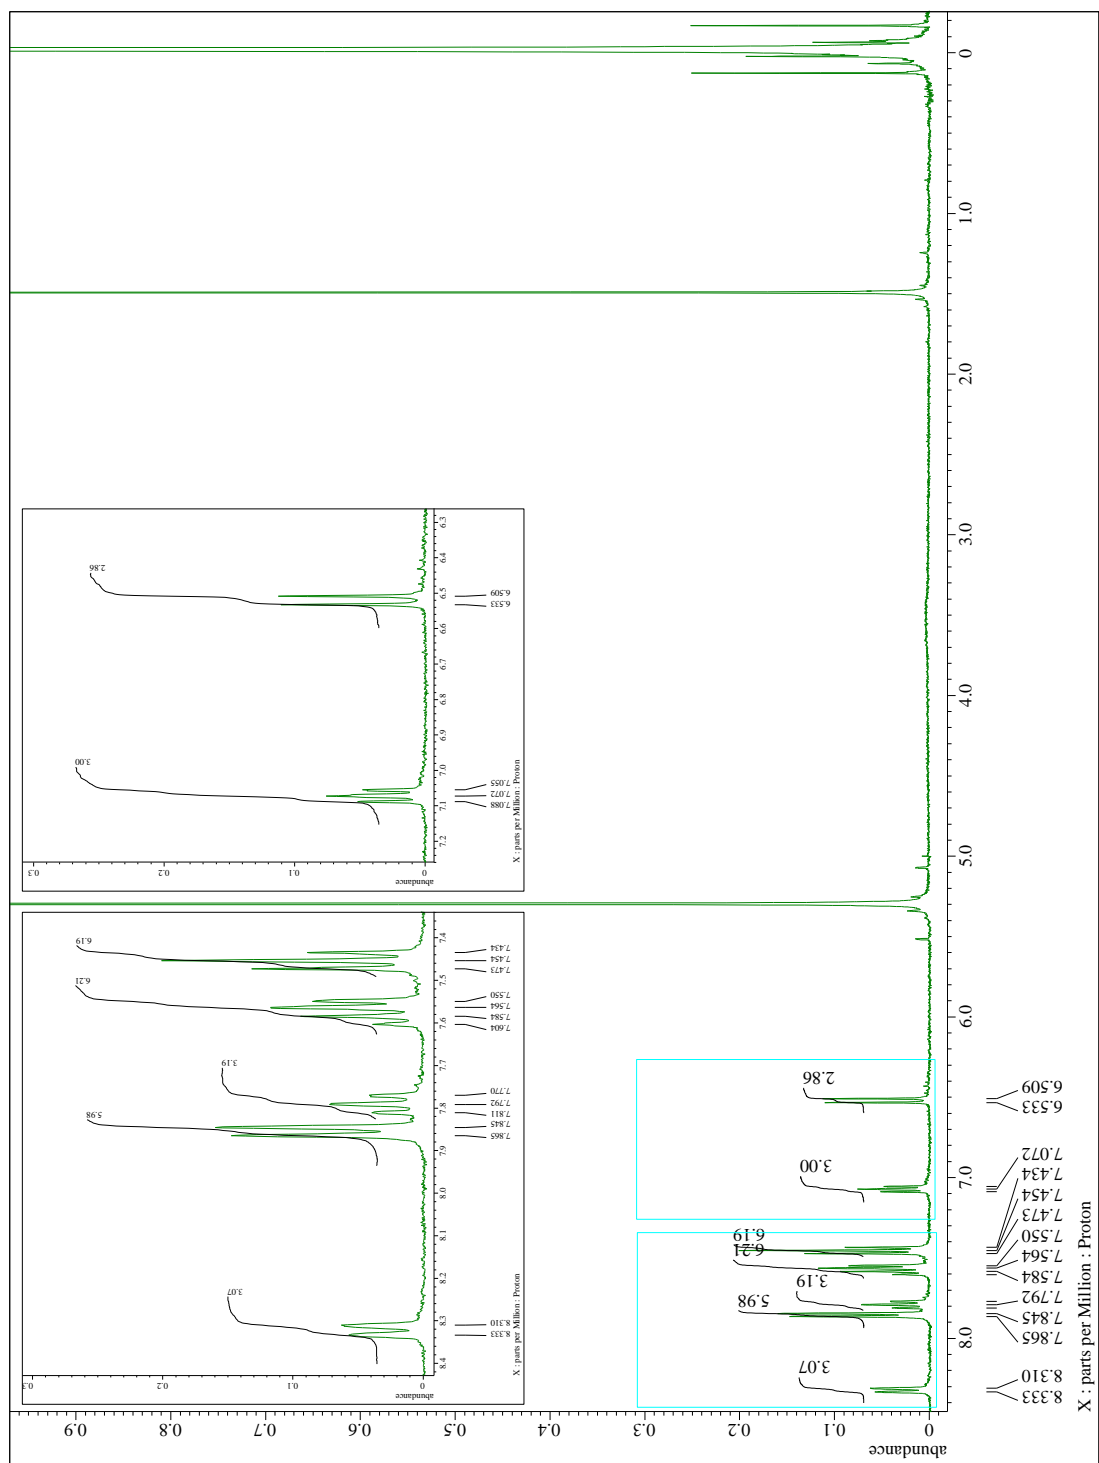

**Fig. S9-6**  $^1\text{H}$  NMR spectrum of **Ir-3c** in  $\text{CD}_2\text{Cl}_2$ .
